# Supplementary material for: Protein arginine methyltransferases interact with intraflagellar transport particles and change location during flagellar growth and resorption
Source: PubMed Central journal article supplement — Mol Biol Cell. 2017 May 1;28(9):1208–22. doi: 10.1091/mbc.E16-11-0774 (PMC5415017; doi:10.1091/mbc.e16-11-0774), 2017-05-01
Supplement: supp_E16-11-0774v1_CombinedSupMats.pdf [file supp_E16-11-0774v1_CombinedSupMats.pdf]

# Supplemental Materials

*Molecular Biology of the Cell*

Mizuno and Sloboda

## Supplementary Information

### Figure S1. Phylogenetic analysis of PRMTs.

A neighbor-joining phylogenetic tree of PRMTs from various organisms. PRMT genes from *Chlamydomonas reinhardtii*, human, sea urchin (*Strongylocentrotus purpuratus*), *Arabidopsis thaliana*, rice (*Oryza sativa*, Japonica group), and yeast (*Saccharomyces cerevisiae*) were aligned. The numbers on the nodes indicate the bootstrap values (1000 replicates). Protein sequences used in the alignments were as follows. *Chlamydomonas*: Cr-PRMT1 (Cre03.g172550), Cr-PRMT2 (Cre12.g558100), Cr-PRMT3 (Cre16.g685900), Cr-PRMT4 (Cre15.g635350), Cr-PRMT5 (Cre03.g176550), Cr-PRMT7 (Cre02.g141626). Human: Hs-PRMT1 (uniprotkb: Q99873), Hs-PRMT2 (uniprotkb: P55345), Hs-PRMT3 (uniprotkb: O60678), Hs-PRMT4/CARM1 (uniprotkb: Q86X55), Hs-PRMT5 (uniprotkb: O14744), Hs-PRMT6 (uniprotkb: Q96LA8), Hs-PRMT7 (uniprotkb: Q9NVM4), Hs-PRMT8 (uniprotkb: Q9NR22), Hs-PRMT9 (uniprotkb: Q6P2P2), Hs-PCMT1 (uniprotkb: P22061). Sea urchin: Sp-PRMT1 (genbank: XP\_011662730), Sp-PRMT2 (genbank: XP\_786231), Sp-PRMT3 (genbank: XP\_011663239), Sp-PRMT4/CARM1 (genbank: XP\_011673927), Sp-PRMT5 (genbank: XP\_011660739), Sp-PRMT6 (genbank: XP\_011679081), Sp-PRMT7 (genbank: XP\_780353), Sp-PRMT8 (genbank: XP\_011662730), Sp-PRMT9 (genbank: XP\_011672088). *Arabidopsis*: At-PRMT 1 (genbank: NP\_179557), At-PRMT 3 (uniprotkb: Q0WVD6), At-PRMT6 (uniprotkb: Q08A71), At-PRMT 10 (uniprotkb: Q9MAT5), At-PRMT11/1b (uniprotkb: Q9SU94), At-PRMT12/1a (uniprotkb: O82210), At-PRMT13/4b (uniprotkb: Q84W92), At-PRMT14/4a (uniprotkb: A3KPF2), At-PRMT15 (uniprotkb: Q8GWT4), At-PRMT16 (uniprotkb: Q944R7). Rice: Os-PRMT 1 (uniprotkb: Q0J2C6), Os-PRMT 3 (uniprotkb: A3BMN9), Os-PRMT4/CARM1 (uniprotkb: Q7XI75), Os-PRMT 5 (uniprotkb: Q6YXZ7), Os-PRMT6a (uniprotkb: Q7XKC0), Os-PRMT6b (uniprotkb: Q75G68), Os-PRMT7 (uniprotkb: Q5VS72), Os-PRMT 10 (uniprotkb: Q9SNQ2). Yeast: ScHMT1 (uniprotkb: P38074), ScHSL7 (uniprotkb: P38274), ScRMT2 (uniprotkb: Q03305). ID for *Chlamydomonas* sequences are from JGI ver5.5 database. Positions for *Chlamydomonas* PRMTs are shown in red on the tree, rice and *Arabidopsis* in blue, yeast in green, sea urchin and human in brown.

### Figure S2. Immunoblot analysis of PRMT1 and PRMT10 affinity purified antibodies.

A. Analysis of affinity purified antibodies to PRMT1 and 10, using a gel sample of whole, intact flagella.  
B. Analysis of affinity purified antibodies to PRMT1 and PRMT10 using flagellar samples from *fla10-1* cells from at the permissive temperature (23 C). The flagella were fractionated as indicated (see Methods for further details on the fractionation). At increased exposure times, as shown here, the PRMT1 antibodies also appear to bind non-specifically to a high molecular weight doublet that is a component of

the axoneme. A BLAST search of the *Chlamydomonas* genome identified five residues of the 15-mer peptide used as antigen in a hypothetical protein having a calculated mass of 265kDa, similar in size, but larger than the bands identified by the PRMT1 antibodies at long exposure times.

**Figure S3. Antigen information relative to the antibodies used in this study.**

Sequence comparisons of the commercial antibodies for PRMT3 and PRMT5 used in this study. The sequences of each antigenic peptide are proprietary information not disclosed by the vendor.

**Figure S4. Sample of control immunofluorescence, second antibody alone.**

Top: Immunofluorescence of wt cells using acetylated tubulin antibodies (red). Middle: Control cells, second antibody alone. Non-specific binding of the second antibody alone occurs in the cell body. However, no signal is observed in the flagella. Bottom: Merged image of A and B. Scale bar, 5  $\mu\text{m}$ .

**Figure S5. Immunofluorescence microscopy of *fla10-1* cells at the permissive temperature (23°C)**

Cells were probed with anti-IFT172 (red, left column) and anti PRMTs (middle, green) as indicated. Flagella outlined with a dashed line box are shown enlarged (4x) in the right-hand column. The localization of IFT172 and PRMTs are sometimes, but not always, identical. Scale bar, 5  $\mu\text{m}$ .

**Figure S6. The intensity of Asym24 puncta in the central region of flagella increases during flagellar resorption.**

Intensities of each punctate spot were plotted as a function of flagellar length. Note that intensities of spots in the central region are greatly increased in resorbing flagella. (B) Boxplot comparison of Asym24 signal intensities in the central region (positions 0.1-0.9 in relative flagella length) are significantly increased in resorbing flagella, as determined by the Steel-Dwass test.

**Table S1. Raw data of PRMT 1 and PRMT 3 intensities for basal puncta during flagellar resorption and regeneration.**

Mean  $\pm$  SEM values from three independent experiments, the numbers of puncta counted, and total flagellar numbers are summarized.

**Table S2. Raw data for flagellar PRMTs 1, 3, 5 and 10 puncta intensities from *fla10-1* cells.**

(A) Summary of the PRMT 1 and PRMT 3 spot intensities at the flagellar tip and the base. Mean  $\pm$  SEM values from three independent experiments, the numbers of puncta counted, and total flagellar numbers are summarized.

(B) Summary of PRMT 1, 3, 5, and 10 spots measured along the flagella length from base to tip. Mean  $\pm$  SEM values from three independent experiments, the numbers of puncta counted, and total flagellar numbers are summarized.

**Table S3. Summary of intensities from the base and the tip of resorbing and regenerating flagella labeled with Asym24 antibodies.**

Mean  $\pm$  SEM values from three independent experiments, the numbers of puncta counted, and total flagellar numbers are summarized.

Figure S1

0.1

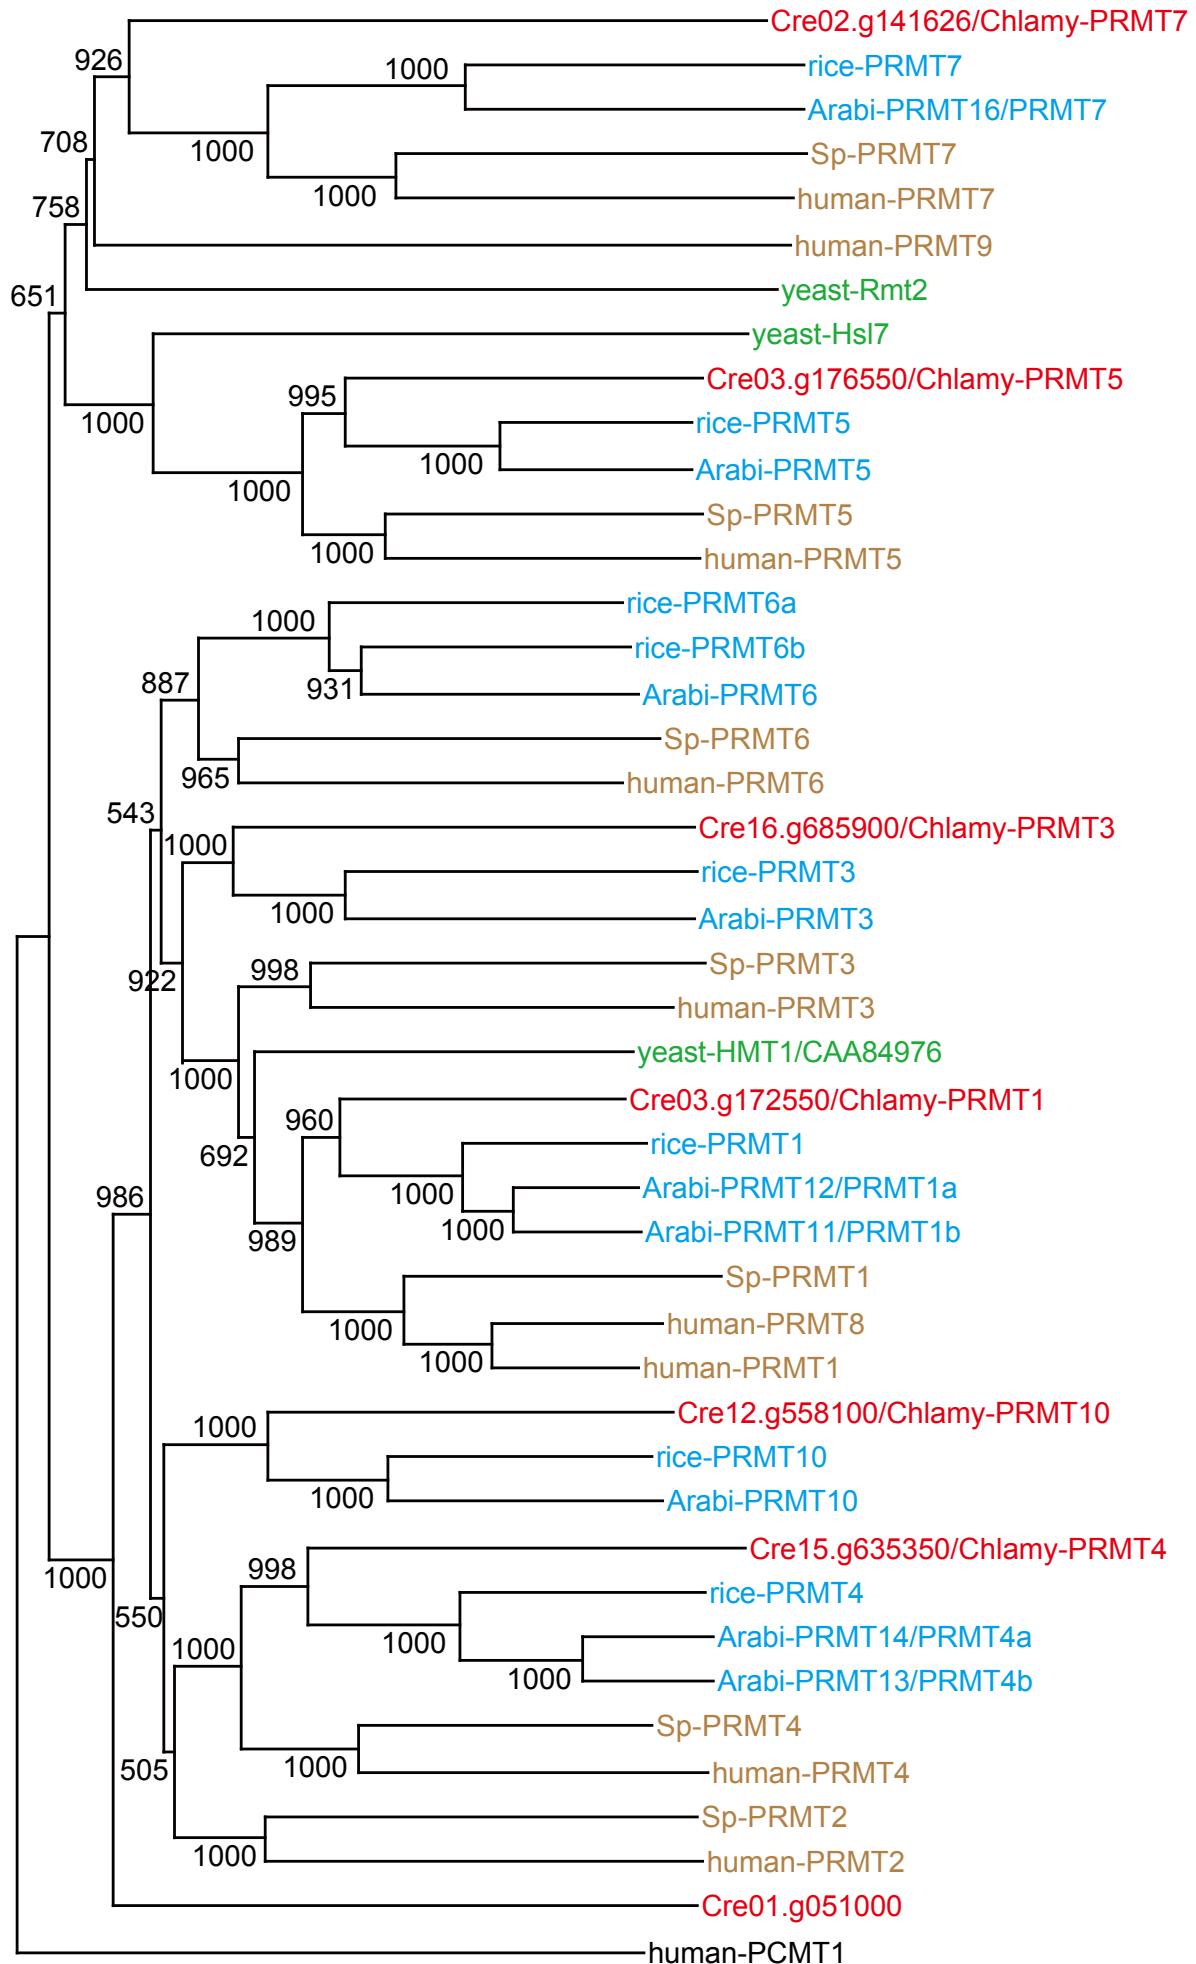

Figure S2

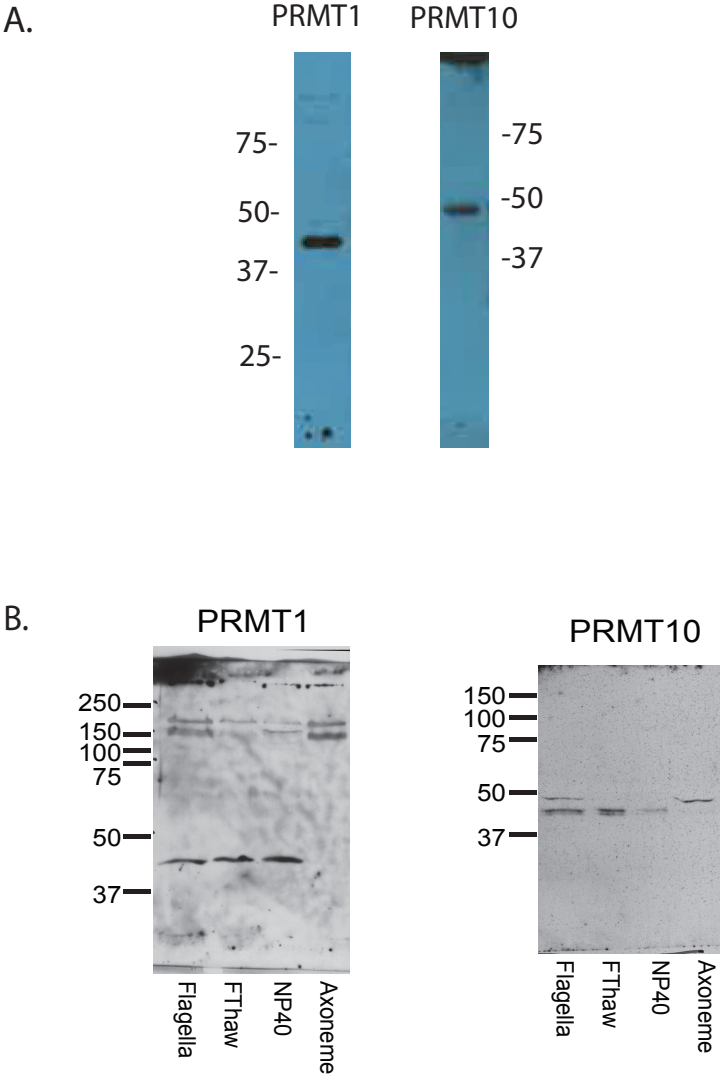

### Figure S3

Similarity of the *Chlamydomonas* PRMT3 sequence (top row) with the sequence containing the antigen (bottom row) used to produce Abcam antibody ab91430. The synthetic antigenic peptide used was derived from the N-terminal 50 amino acids of human PRMT3 (accession number NP\_005779.1).

```
26GREEEWDEWNGDAEDAD  
G E W+ D +DAD  
28GDEAAWE----DEDDAD
```

and

```
132DVSPWADDRYLVPVLEDDALL  
D + W+D EDDA L  
28DEAAWED-----EDDADL
```

Similarity of the *Chlamydomonas* PRMT5 sequence (top row) with the sequence containing the antigen (bottom) used to produce Abcam antibody ab31751. The synthetic antigenic peptide used was derived from within residues 600 to the C-terminus of human PRMT5 (accession number XM\_017020927).

```
545NTVLHGFAGYFETVLYQDITLSIRPETHSPGMFSWFPIILFPIKQPITVREGQTICVRFWR  
VLHGFAGYFE LY+D+ LSI P +HS MFSWFPI FP+++P+ V G + V+ WR  
613AAVLHGFAGYFECALYKDVLLSIHPPSHSVNMFSWFPIFFPLREPVIYPAGGEVGVQVWR  
  
605CSNSKKVWYEWAVTAPVCSAIHNPTGRSYTIGL  
C KVWYEWAAAAPV IHN GRSY +GL  
673CCAPHKVWYEWALSAPVAGPIHNVNGRSYVWGL
```

Figure S4

Ac Tubulin

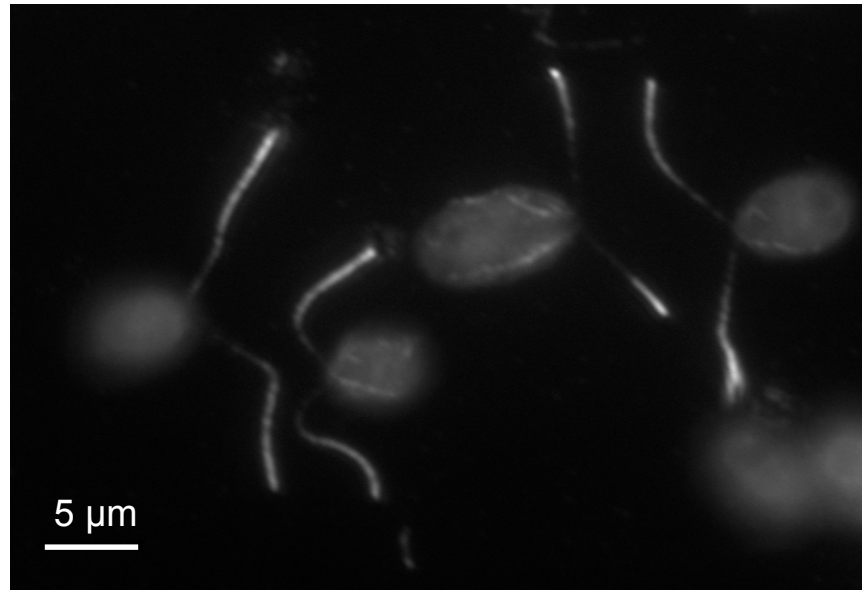

Control

(2nd antibody only)

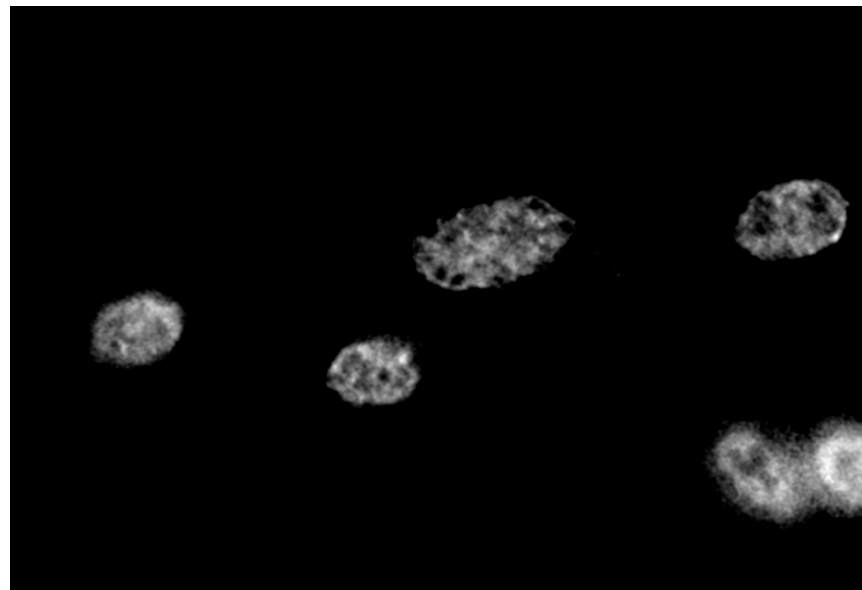

Merge

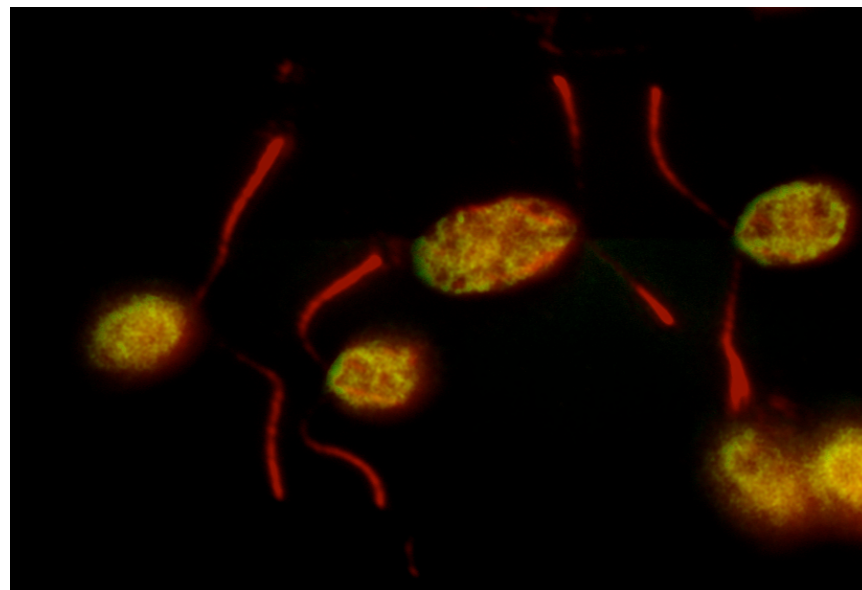



Figure S5

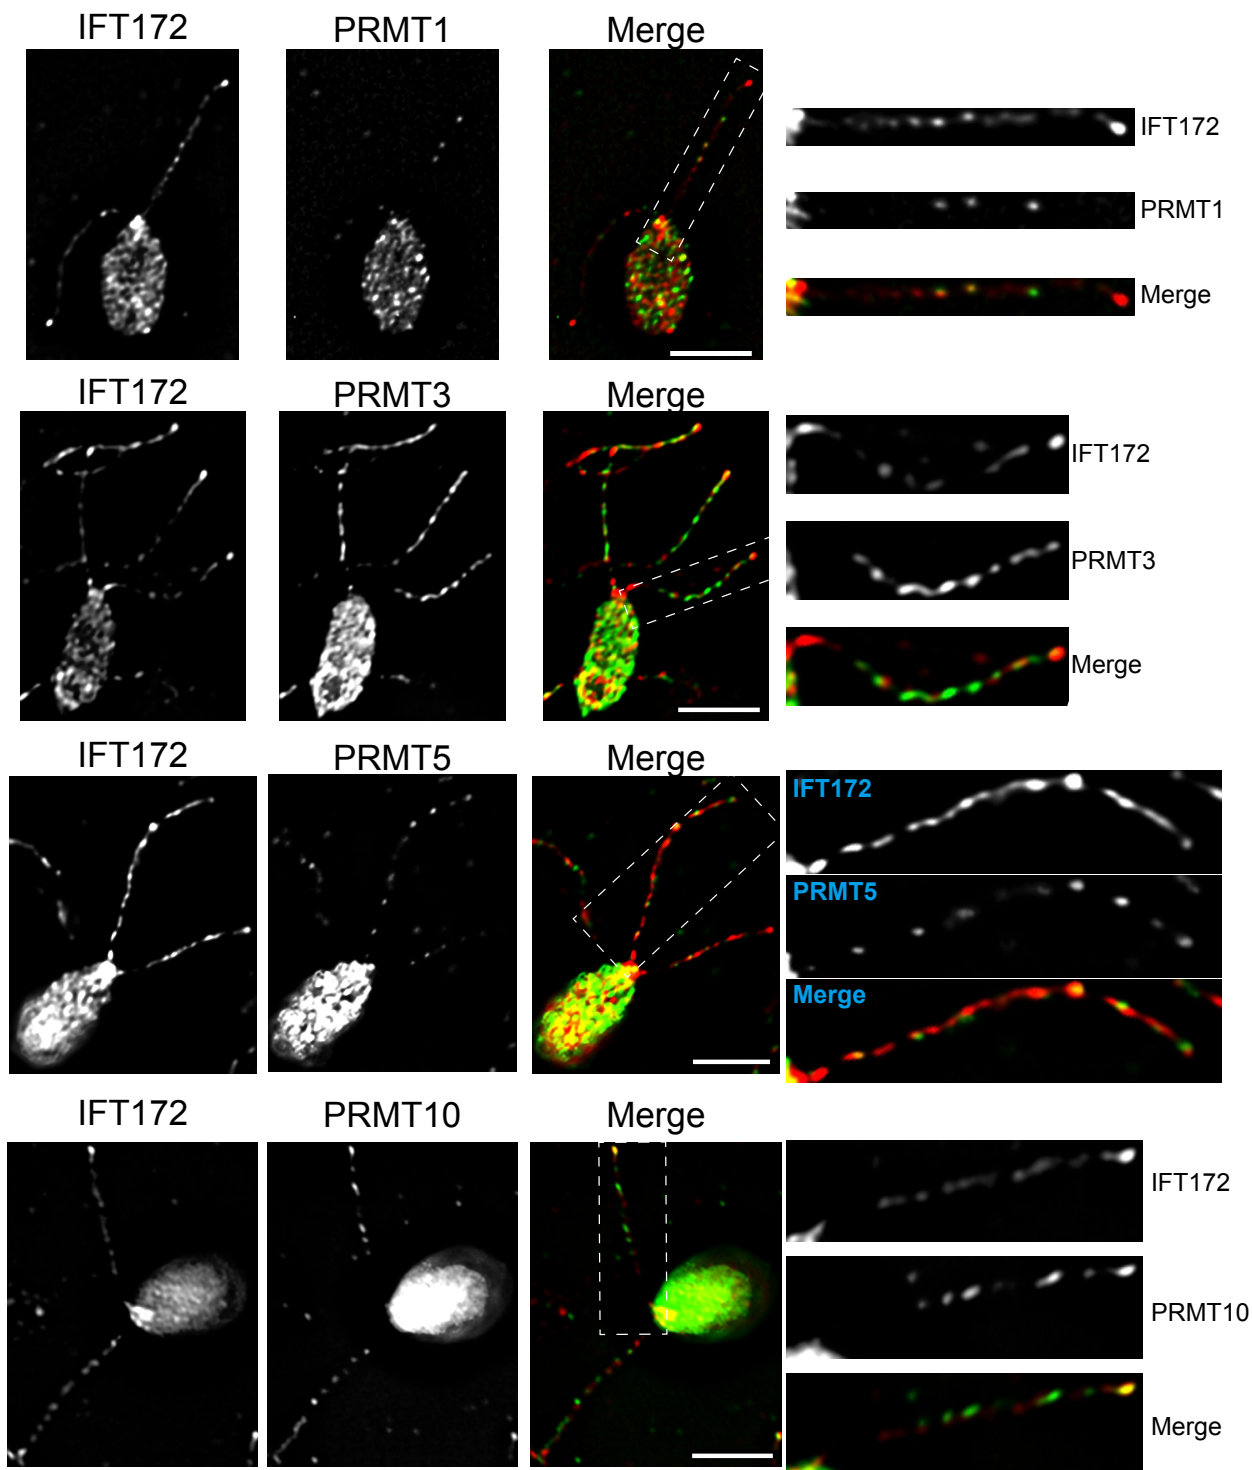

**A**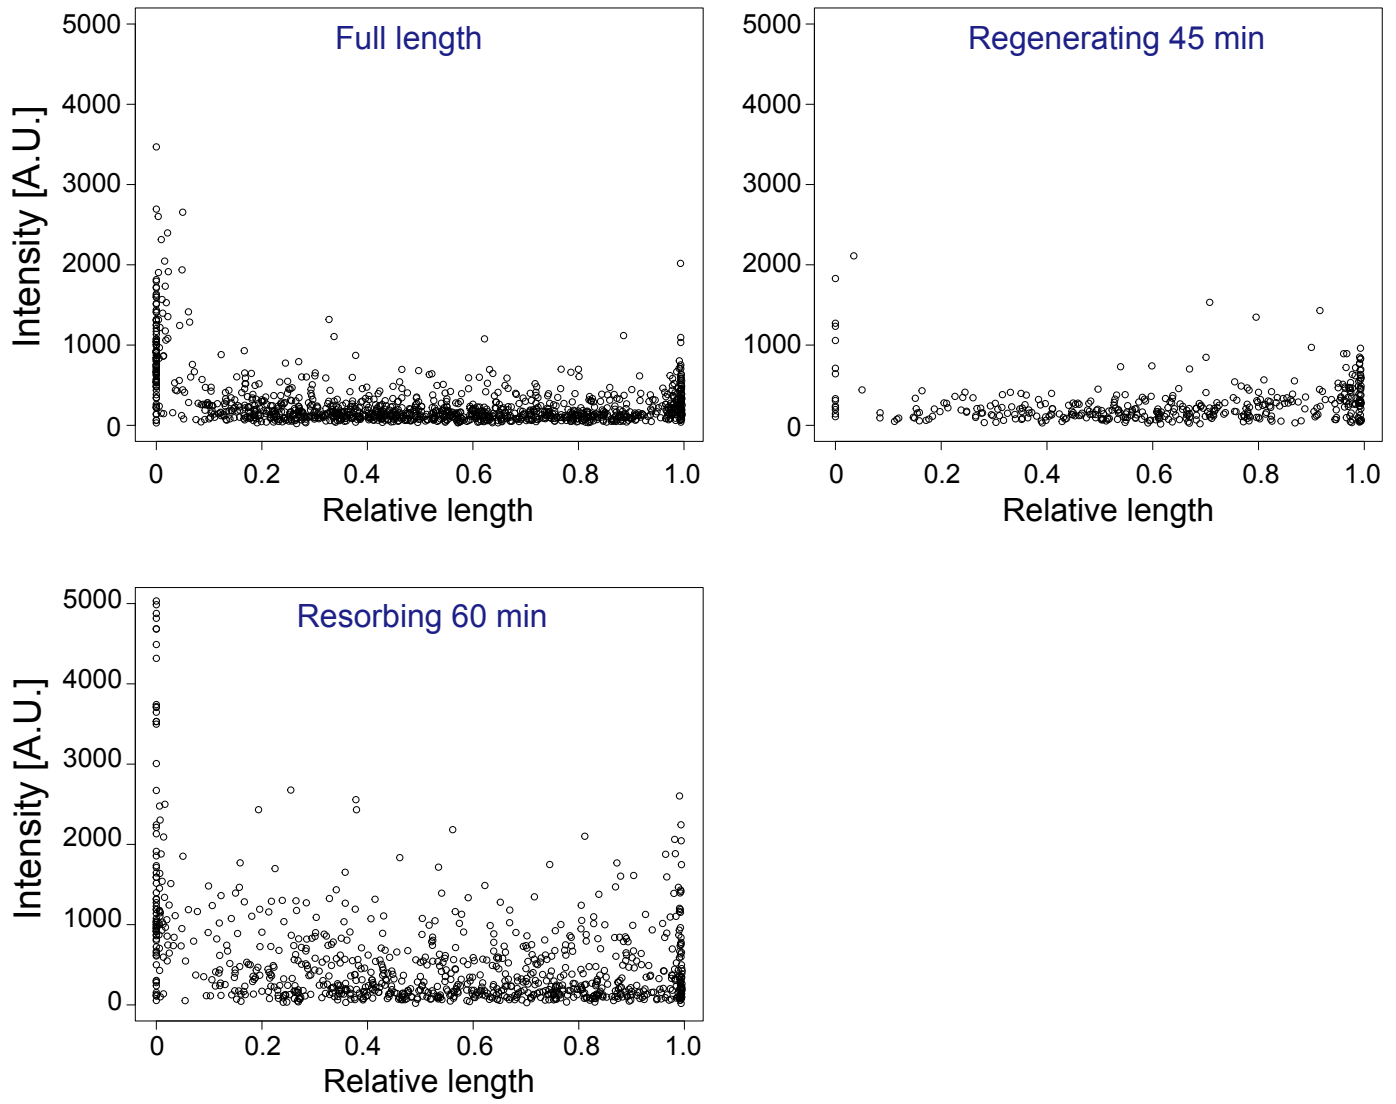**B**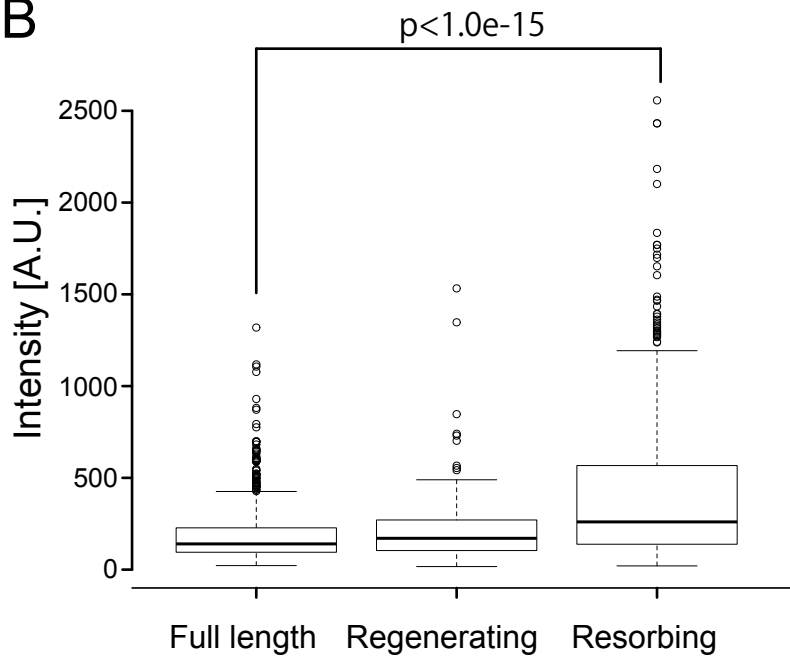

Figure S6

Table S1

## Basal PRMT1 intensity

| time         |                 | 0            | 15            | 30           | 45           | 60           | 90           | 120          |
|--------------|-----------------|--------------|---------------|--------------|--------------|--------------|--------------|--------------|
| Regenerating | Mean $\pm$ SEM  | 455 $\pm$ 54 | 286 $\pm$ 55  | 199 $\pm$ 25 | 344 $\pm$ 62 | 717 $\pm$ 89 | 379 $\pm$ 57 | NA           |
|              | Spot number     | 113          | 22            | 32           | 52           | 68           | 97           | NA           |
|              | Flagella number | 170          | 100           | 112          | 122          | 101          | 139          | NA           |
| Resorbing    | Mean $\pm$ SEM  | 455 $\pm$ 54 | 539 $\pm$ 103 | 224 $\pm$ 28 | 182 $\pm$ 23 | 544 $\pm$ 70 | 439 $\pm$ 56 | 461 $\pm$ 71 |
|              | Spot number     | 113          | 44            | 68           | 62           | 58           | 90           | 66           |
|              | Flagella number | 170          | 90            | 125          | 163          | 104          | 145          | 73           |

## Basal PRMT3 intensity

| time         |                 | 0              | 15             | 30             | 45             | 60             | 90           | 120           |
|--------------|-----------------|----------------|----------------|----------------|----------------|----------------|--------------|---------------|
| Regenerating | Mean $\pm$ SEM  | 2042 $\pm$ 133 | 1038 $\pm$ 185 | 891 $\pm$ 168  | 1137 $\pm$ 215 | 921 $\pm$ 77   | 870 $\pm$ 92 | NA            |
|              | Spot number     | 127            | 21             | 26             | 28             | 72             | 76           | NA            |
|              | Flagella number | 148            | 31             | 51             | 70             | 100            | 108          | NA            |
| Resorbing    | Mean $\pm$ SEM  | 2042 $\pm$ 133 | 1176 $\pm$ 98  | 1230 $\pm$ 153 | 663 $\pm$ 56   | 1095 $\pm$ 111 | 858 $\pm$ 71 | 1175 $\pm$ 84 |
|              | Spot number     | 127            | 90             | 65             | 81             | 25             | 68           | 77            |
|              | Flagella number | 148            | 104            | 97             | 114            | 29             | 78           | 100           |

## Tip PRMT1 intensity

| time         |                 | 0            | 15           | 30           | 45           | 60            | 90           | 120          |
|--------------|-----------------|--------------|--------------|--------------|--------------|---------------|--------------|--------------|
| Regenerating | Mean $\pm$ SEM  | 180 $\pm$ 17 | 182 $\pm$ 51 | 208 $\pm$ 26 | 452 $\pm$ 41 | 419 $\pm$ 100 | 246 $\pm$ 28 | NA           |
|              | Spot number     | 80           | 12           | 36           | 60           | 53            | 62           | NA           |
|              | Flagella number | 170          | 96           | 112          | 121          | 101           | 139          | NA           |
| Resorbing    | Mean $\pm$ SEM  | 180 $\pm$ 17 | 142 $\pm$ 14 | 101 $\pm$ 15 | 94 $\pm$ 22  | 233 $\pm$ 23  | 269 $\pm$ 36 | 122 $\pm$ 18 |
|              | Spot number     | 80           | 45           | 47           | 44           | 52            | 52           | 29           |
|              | Flagella number | 170          | 90           | 125          | 163          | 104           | 145          | 73           |

## Tip PRMT3 intensity

| time         |                 | 0             | 15             | 30           | 45             | 60            | 90           | 120          |
|--------------|-----------------|---------------|----------------|--------------|----------------|---------------|--------------|--------------|
| Regenerating | Mean $\pm$ SEM  | 1075 $\pm$ 76 | 1307 $\pm$ 277 | 813 $\pm$ 83 | 1113 $\pm$ 235 | 846 $\pm$ 73  | 988 $\pm$ 82 | NA           |
|              | Spot number     | 123           | 11             | 32           | 44             | 73            | 101          | NA           |
|              | Flagella number | 158           | 29             | 51           | 70             | 100           | 108          | NA           |
| Resorbing    | Mean $\pm$ SEM  | 1075 $\pm$ 76 | 697 $\pm$ 66   | 862 $\pm$ 78 | 523 $\pm$ 38   | 930 $\pm$ 119 | 706 $\pm$ 70 | 868 $\pm$ 78 |
|              | Spot number     | 123           | 83             | 73           | 88             | 18            | 62           | 57           |
|              | Flagella number | 158           | 104            | 97           | 114            | 29            | 78           | 100          |

Spot counts and flagella counts are combined values from three independent experiments.

Table S2

A. Tip and basal intensity of PRMT1 and PRMT3 in *fla10-1*

| Tip intensities |          |          |          |          |
|-----------------|----------|----------|----------|----------|
| temperature     | PRMT1    |          | PRMT3    |          |
|                 | 23°C     | 32°C     | 23°C     | 32°C     |
| Mean ± SEM      | 182 ± 38 | 158 ± 42 | 643 ± 37 | 437 ± 40 |
| Spot number     | 23       | 14       | 100      | 54       |
| Flagella number | 94       | 79       | 124      | 75       |

| Base intensities |           |          |           |          |
|------------------|-----------|----------|-----------|----------|
| temperature      | PRMT1     |          | PRMT3     |          |
|                  | 23°C      | 32°C     | 23°C      | 32°C     |
| Mean ± SEM       | 947 ± 116 | 197 ± 28 | 1584 ± 99 | 724 ± 94 |
| Spot number      | 74        | 34       | 114       | 54       |
| Flagella number  | 94        | 79       | 124       | 75       |

Spot counts and flagella counts are combined values from three independent experiments.

## B. Intensities of PRMT spots along the flagellar length

| Intensities     |          |          |          |          |
|-----------------|----------|----------|----------|----------|
| temperature     | PRMT1    |          | PRMT3    |          |
|                 | 23°C     | 32°C     | 23°C     | 32°C     |
| Mean ± SEM      | 492 ± 55 | 172 ± 17 | 353 ± 29 | 306 ± 28 |
| Spot number     | 180      | 98       | 458      | 233      |
| Flagella number | 94       | 79       | 124      | 75       |

| temperature     | PRMT5    |          | PRMT10   |          |
|-----------------|----------|----------|----------|----------|
|                 | 23°C     | 32°C     | 23°C     | 32°C     |
| Mean ± SEM      | 811 ± 22 | 472 ± 23 | 311 ± 12 | 173 ± 12 |
| Spot number     | 819      | 339      | 320      | 186      |
| Flagella number | 67       | 58       | 98       | 71       |

Table S3

## Basal Asym24 intensity

| time         |                 | 0            | 15             | 30            | 45             | 60             | 90             | 120            |
|--------------|-----------------|--------------|----------------|---------------|----------------|----------------|----------------|----------------|
| Regenerating | Mean $\pm$ SEM  | 971 $\pm$ 55 | 903 $\pm$ 94   | 966 $\pm$ 194 | 684 $\pm$ 159  | 2403 $\pm$ 313 | 1973 $\pm$ 247 | NA             |
|              | Spot number     | 120          | 36             | 16            | 16             | 31             | 57             | NA             |
|              | Flagella number | 172          | 84             | 103           | 107            | 107            | 111            | NA             |
| Resorbing    | Mean $\pm$ SEM  | 971 $\pm$ 55 | 1301 $\pm$ 117 | 1797 $\pm$ 98 | 2803 $\pm$ 344 | 2085 $\pm$ 184 | 1586 $\pm$ 164 | 1186 $\pm$ 109 |
|              | Spot number     | 120          | 74             | 153           | 34             | 118            | 102            | 38             |
|              | Flagella number | 172          | 113            | 176           | 73             | 140            | 119            | 56             |

## Tip Asym24 intensity

| time         |                 | 0            | 15           | 30           | 45           | 60           | 90           | 120          |
|--------------|-----------------|--------------|--------------|--------------|--------------|--------------|--------------|--------------|
| Regenerating | Mean $\pm$ SEM  | 278 $\pm$ 14 | 260 $\pm$ 29 | 268 $\pm$ 19 | 382 $\pm$ 25 | 500 $\pm$ 65 | 655 $\pm$ 85 | NA           |
|              | Spot number     | 153          | 52           | 92           | 95           | 103          | 109          | NA           |
|              | Flagella number | 172          | 84           | 103          | 107          | 107          | 111          | NA           |
| Resorbing    | Mean $\pm$ SEM  | 278 $\pm$ 14 | 377 $\pm$ 30 | 405 $\pm$ 27 | 501 $\pm$ 64 | 502 $\pm$ 43 | 450 $\pm$ 37 | 345 $\pm$ 39 |
|              | Spot number     | 153          | 105          | 163          | 67           | 124          | 106          | 54           |
|              | Flagella number | 172          | 113          | 176          | 73           | 140          | 119          | 56           |

Spot counts and flagella counts are combined values from three independent experiments.
